# Supplementary material for: Unidirectional rotation of micromotors on water powered by pH-controlled disassembly of chiral molecular crystals
Source: PubMed Central journal article supplement (PMC10198998; doi:10.1038/s41467-023-38308-9), 2023-05-19
Supplement: 41467_2023_38308_MOESM3_ESM.pdf [file 41467_2023_38308_MOESM3_ESM.pdf]

### Description of Additional Supplementary Files

File Name: Supplementary Movie 1  
Description: Chimot +

File Name: Supplementary Movie 2  
Description: Chimot –

File Name: Supplementary Movie3  
Description: 7 vessels chimot(-)

File Name: Supplementary Movie 4  
Description: 7vessel chimot(+)

File Name: Supplementary Movie 5  
Description: Chimot(+) with load

File Name: Supplementary Movie 6  
Description: Chimot(-) with load

File Name: Supplementary Movie7  
Description: Chimot(+) with  $\text{NBH}_4$

File Name: Supplementary Movie 8  
Description: Chimot(-) with  $\text{NBH}_4$
